# Supplementary material for: A multi-faceted structural, thermodynamic, and spectroscopic approach for investigating ethanol dehydration over transition phase aluminas
Source: Royal Society of Chemistry journal article supplement (doi:10.1039/d2cp04016f), 2022-12-09
Supplement: d2cp04016f1.pdf [file d2cp04016f1.pdf]

## *Supporting Information*

# A Multi-Faceted Structural, Thermodynamic, and Spectroscopic Approach for Investigating Ethanol Dehydration over Transition Phase Aluminas

*Nicholas A. Strange*<sup>1\*</sup>, *Sourav Adak*<sup>1</sup>, *Zachary Stroupe*<sup>1</sup>, *Christopher A. Crain*<sup>1</sup>, *Eric C. Novak*<sup>2</sup>,  
*Luke L. Daemen*<sup>2</sup>, *J. Z. Larese*<sup>1,3,4</sup>

\*Corresponding Author: *nstrange@SLAC.Stanford.edu*

<sup>1</sup> Department of Chemistry, University of Tennessee, Knoxville, TN 37996

<sup>2</sup> Neutron Scattering Division, Oak Ridge National Laboratory, Oak Ridge, Tennessee 37831,  
United States

<sup>3</sup> Joint Institute for Advanced Materials; Knoxville, TN 37920

<sup>4</sup> Shull-Wollan Center, a Joint Institute for Neutron Sciences; Oak Ridge, TN 37831

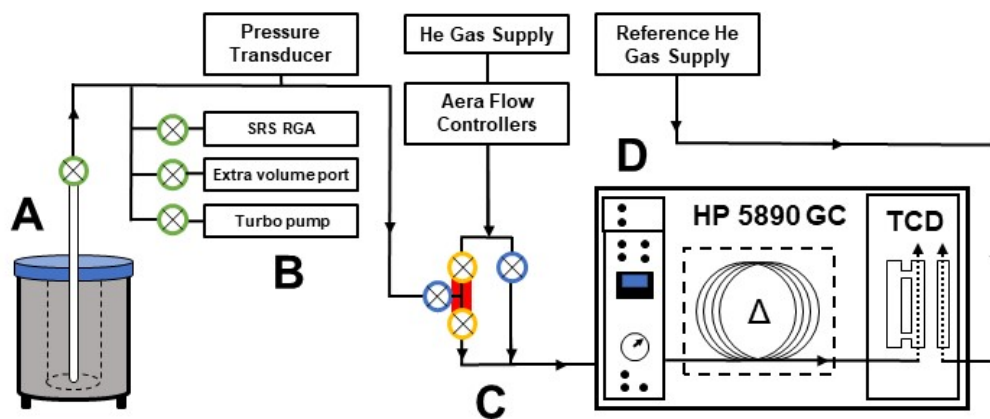

**Figure S1.** Schematic of the TPD apparatus coupled to a GC-TCD. The individual components are labeled as: A – sample cell, B – ancillary equipment ports, C – sample manifold, and D – GC-TCD.

The green valves represent manual bellows valves. Blue and yellow valves are pneumatically actuated (by color) bellows valves and are operated by a double-pole double-throw switch. When actuated together (by color), the valves turn the gas line outlined in red into a flow cell at the interface between the manifold and GC. The TCD detector produces a 0-1 VDC signal which is fed into an analog-to-digital converter whereby the signal can be read by a computer.

**Table S1.** Relevant parameters for GC-TCD

| <b>Gas Chromatography Parameters</b> | <b>Value</b>                      |
|--------------------------------------|-----------------------------------|
| Stationary Phase                     | Hayesep T porous polymer (packed) |
| Column dimensions                    | L = 2 m, i.d. = 2.2 mm            |
| Mobile Phase                         | UHP Helium                        |
| Mobile Phase flow rate (mL/sec)      | 0.529                             |
| Inlet Head Pressure (kPa)            | 58                                |
| Reference Gas flow rate (mL/sec)     | 2.53                              |
| Initial Oven Temperature (°C)        | 140                               |
| Initial Oven Hold Time (min)         | 1.5                               |
| Temperature Ramp Rate (°C/min)       | 40                                |
| Final Oven Temperature (°C)          | 250                               |
| Final Oven Hold Time (min)           | 5                                 |
| Detector Temperature (°C)            | 175                               |

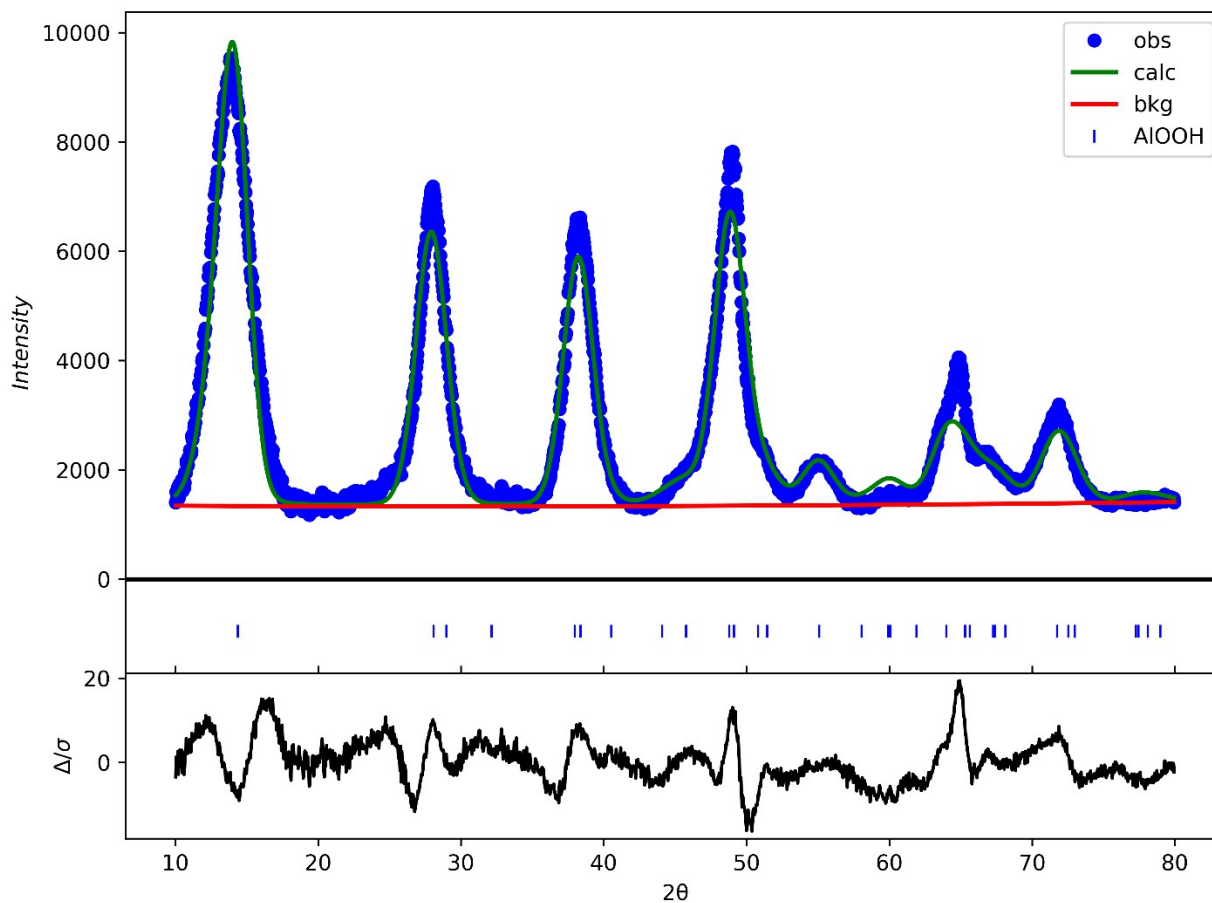

**Figure S2.** Rietveld refinement of the boehmite starting material XRD data. The initial orthorhombic structural model for boehmite was obtained from ICSD (59610) and converged with lattice parameters,  $a = 2.8551 \text{ \AA}$ ,  $b = 12.3111 \text{ \AA}$ , and  $c = 3.7059 \text{ \AA}$ . The refinement converged with  $R_w = 0.1014$  and  $R = 0.0809$ .

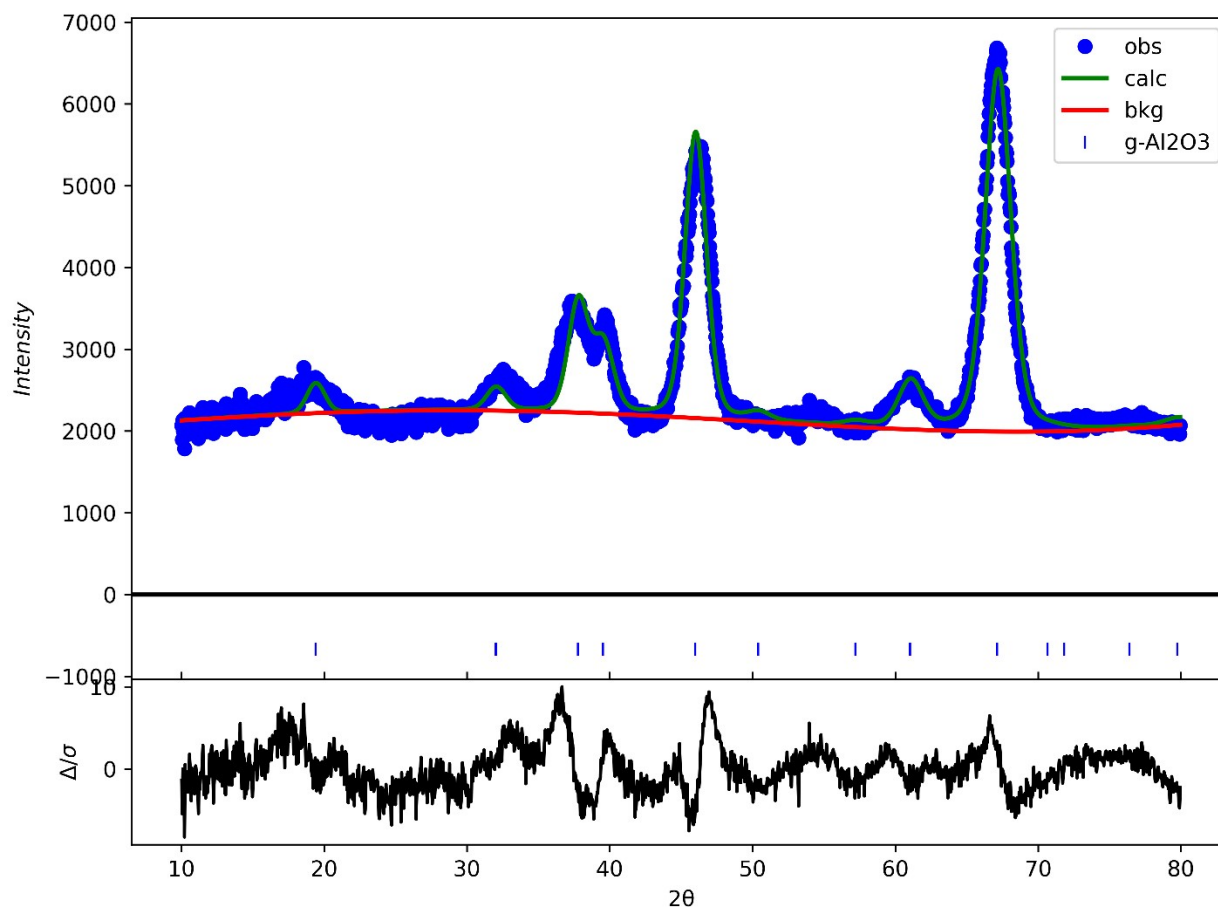

**Figure S3.** Rietveld refinement of the  $\gamma$ -alumina XRD data derived from heating boehmite at 600 °C for 8 hours. The initial cubic structural model for  $\theta$ -alumina was obtained from ICSD (66559) and converged with lattice parameter,  $a = 7.8705 \text{ \AA}$ . The refinement converged with  $R_w = 0.0537$  and  $R = 0.0430$ .

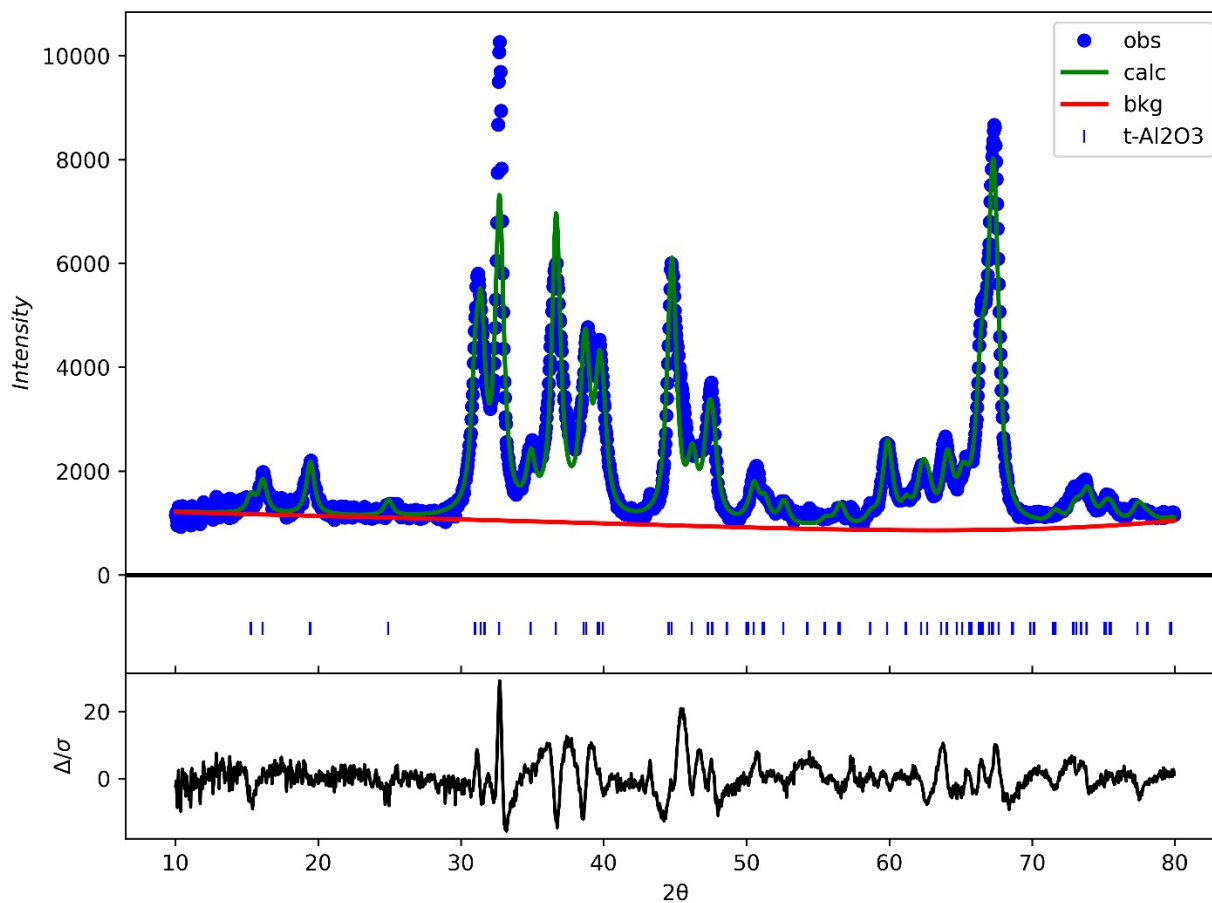

**Figure S4.** Rietveld refinement of the  $\theta$ -alumina XRD data derived from heating boehmite at 1050 °C for 8 hours. The initial monoclinic structural model for  $\theta$ -alumina was obtained from ICSD (82504) and converged with lattice parameters,  $a = 11.8401 \text{ \AA}$ ,  $b = 2.9018 \text{ \AA}$ ,  $c = 5.6190 \text{ \AA}$ , and  $\beta = 103.817^\circ$ . The refinement converged with  $R_w = 0.1039$  and  $R = 0.0791$ .

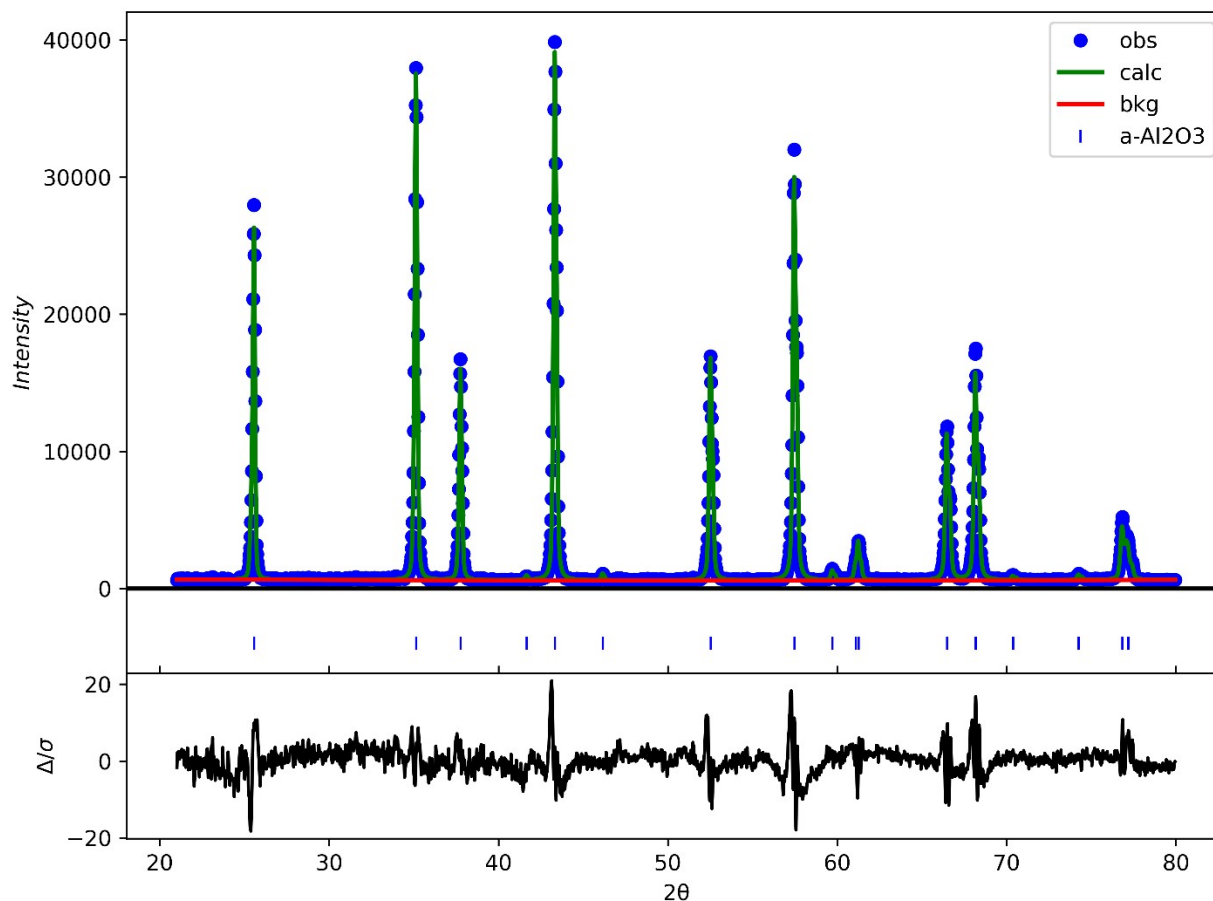

**Figure S5.** Rietveld refinement of the  $\alpha$ -alumina XRD data derived from heating boehmite at 1200 °C for 12 hours. The initial trigonal structural model for  $\alpha$ -alumina was obtained from ICSD (10425) and converged with lattice parameters,  $a = 4.76102 \text{ \AA}$  and  $c = 12.9985 \text{ \AA}$ . The refinement converged with  $R_w = 0.0862$  and  $R = 0.0650$ .

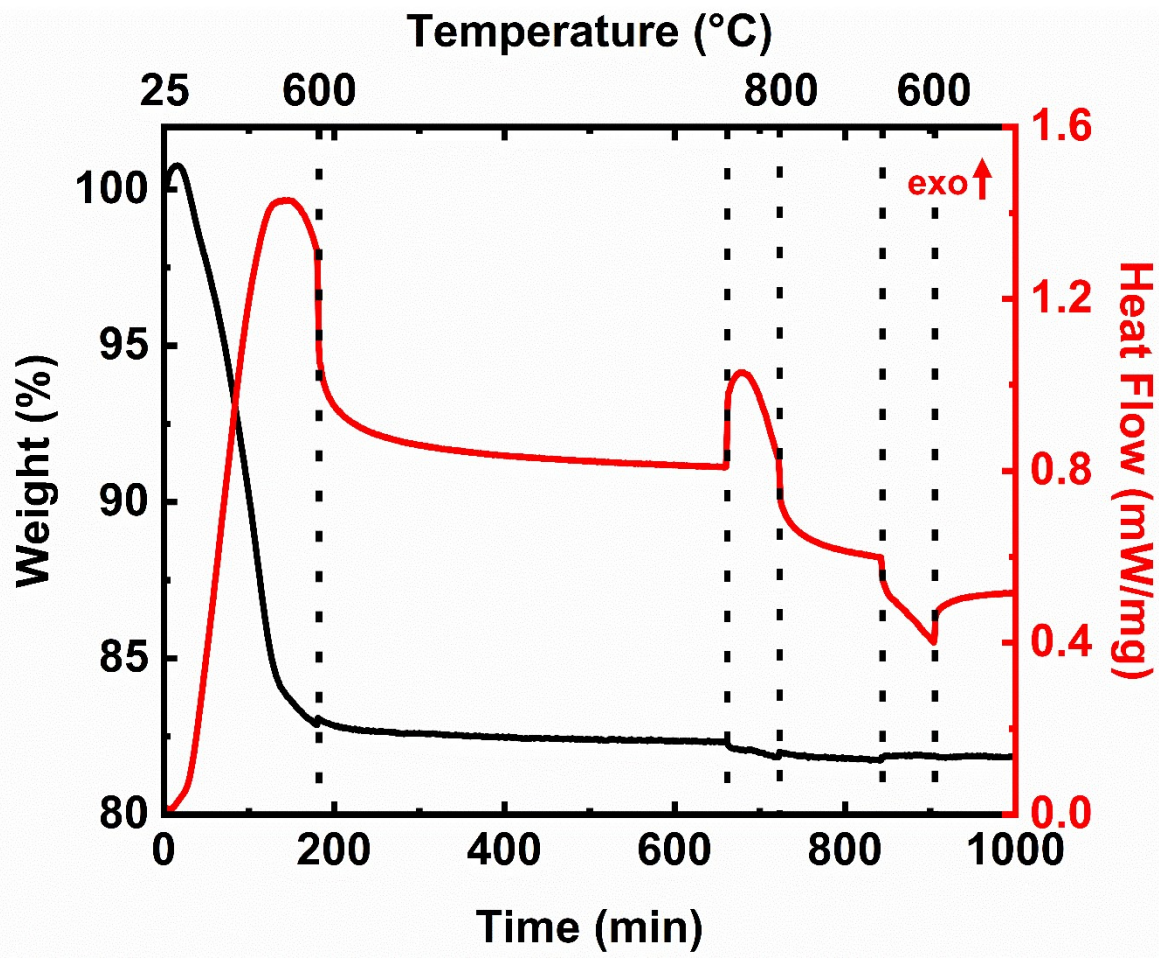

**Figure S6.** TGA-DSC for the calcination of boehmit to  $\delta$ -alumina. The black trace (left axis) represents the fractional weight of the starting material. The corresponding DSC is shown in red (right axis).



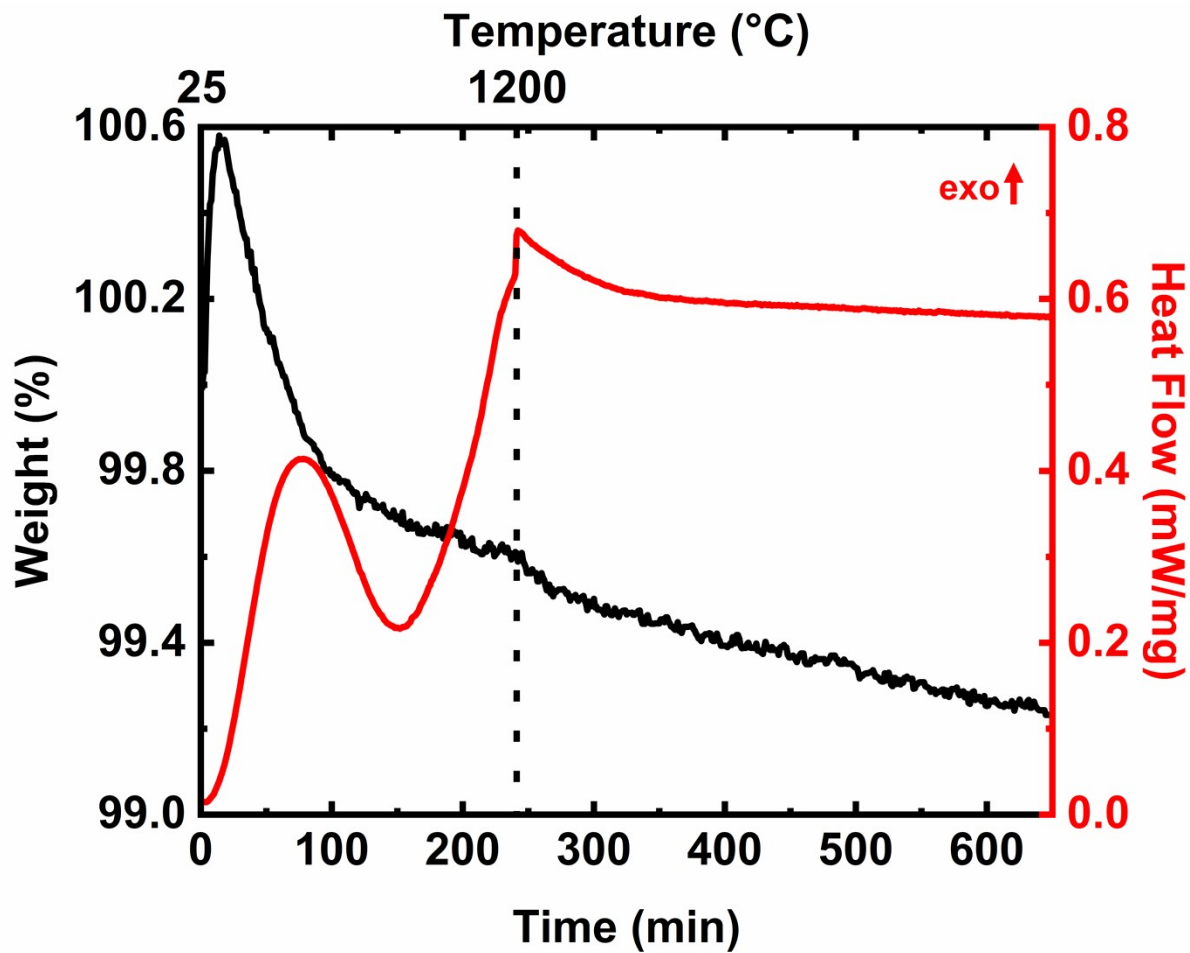

**Figure S7.** TGA-DSC for the calcination of  $\theta$ - to  $\alpha$ -alumina. The black trace (left axis) represents the fractional weight of the starting material. The corresponding DSC is shown in red (right axis).

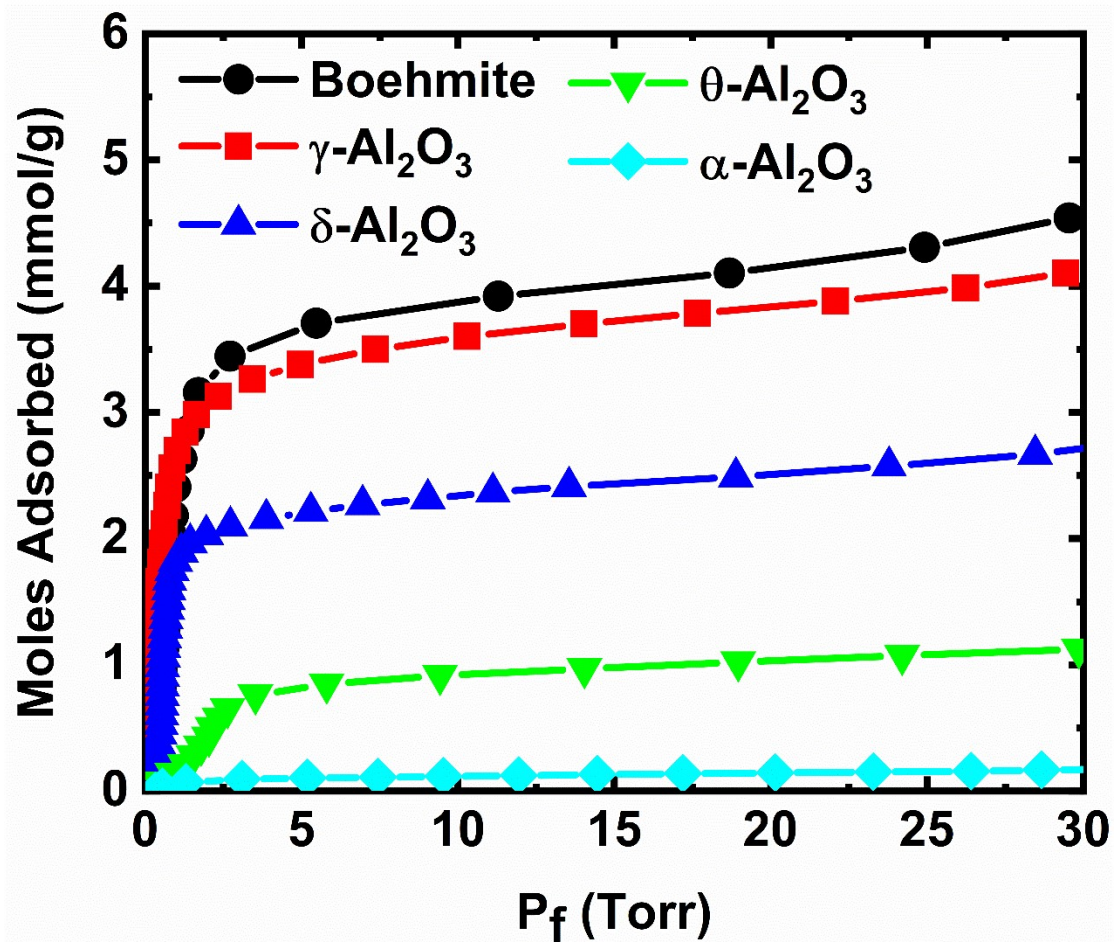

**Figure S8.** Adsorption isotherms from the calibration of monolayer coverage for ethanol on the aluminas

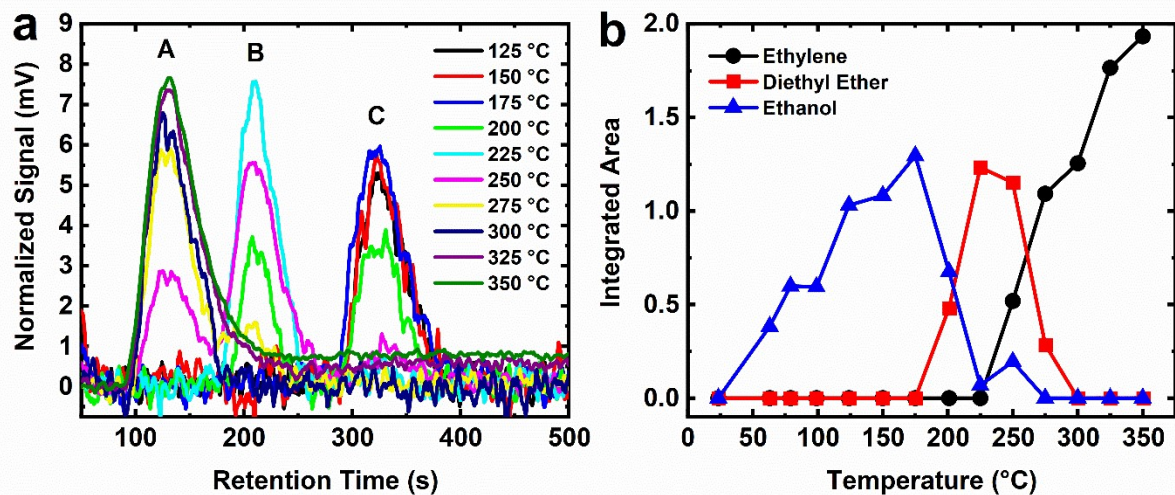

**Figure S9.** (a) TPD of monolayer coverage ethanol on the surface of  $\delta$ -alumina. The observed peaks are labeled as A – ethylene, B – diethyl ether, and C – ethanol. (b) Numerically integrated peak areas obtained from the TPD as a function of temperature.

The TPD results displayed Figure S9 from ethanol adsorbed on the surface of  $\delta$ -alumina clearly show that the temperature at which diethyl ether and ethylene form is consistent with the results reported previously for  $\gamma$ -alumina. At low temperatures, the gas phase signal from dissociated ethanol on  $\delta$ -alumina is reduced appreciably in comparison to that from  $\gamma$ -alumina. This means there is a greater number of the surface sites on  $\delta$ -alumina where ethanol is more tightly bound at low temperatures (e.g., chemisorbed ethoxide) than there are on  $\gamma$ -alumina. The  $^{27}\text{Al}$  NMR results indicate that  $\delta$ -alumina has a greater concentration of  $\text{Al}_V$  sites relative to the  $\gamma$ -phase but, perhaps during the calcination additional under-coordinated sites which are dehydroxylated also form. As the dissociated ethanol signal plateaus near 175 °C, diethyl ether is observed. Ethylene formation is detected at temperatures greater than 225 °C which is consistent with  $\gamma$ -alumina, suggesting similar mechanisms for dehydration from an intermediate state. Although the surface of the  $\delta$ -phase may contain more  $\text{Al}^{3+}$  reactive sites than the  $\gamma$ -phase, the reduced surface area appears to limit the total ethylene production at 350 °C.

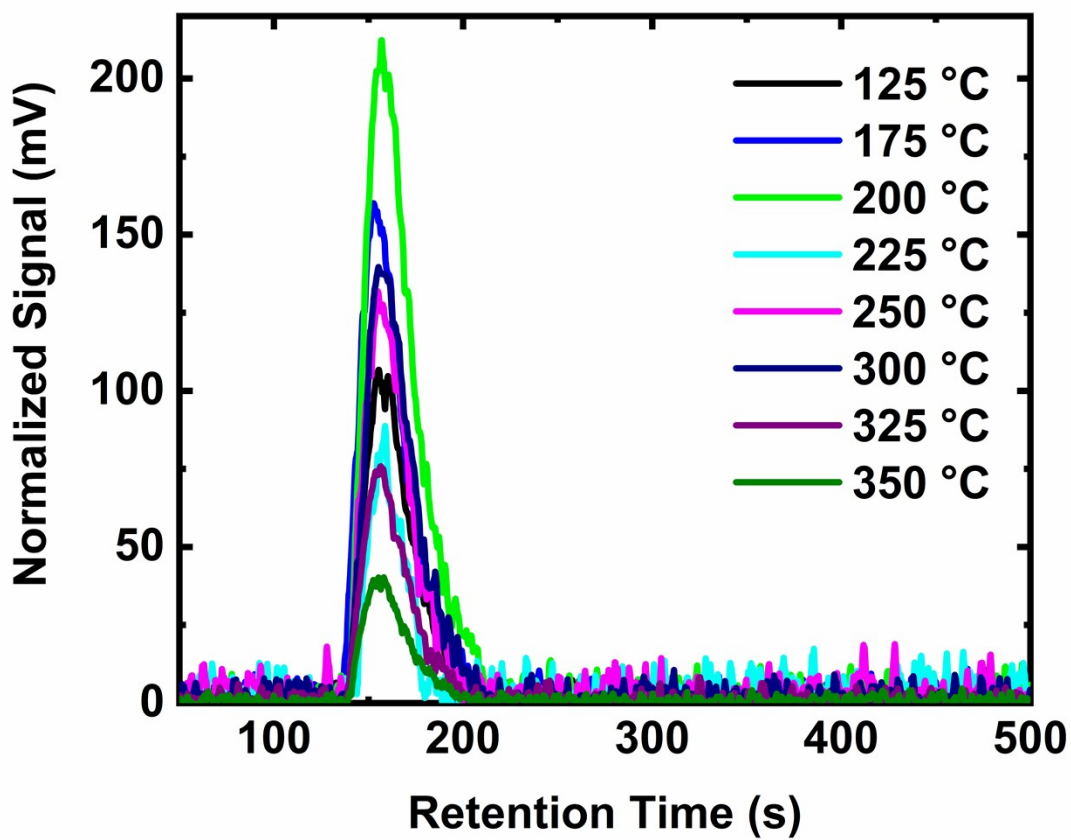

Figure S10. TPD from monolayer coverage ethanol on the surface of  $\alpha$ -alumina

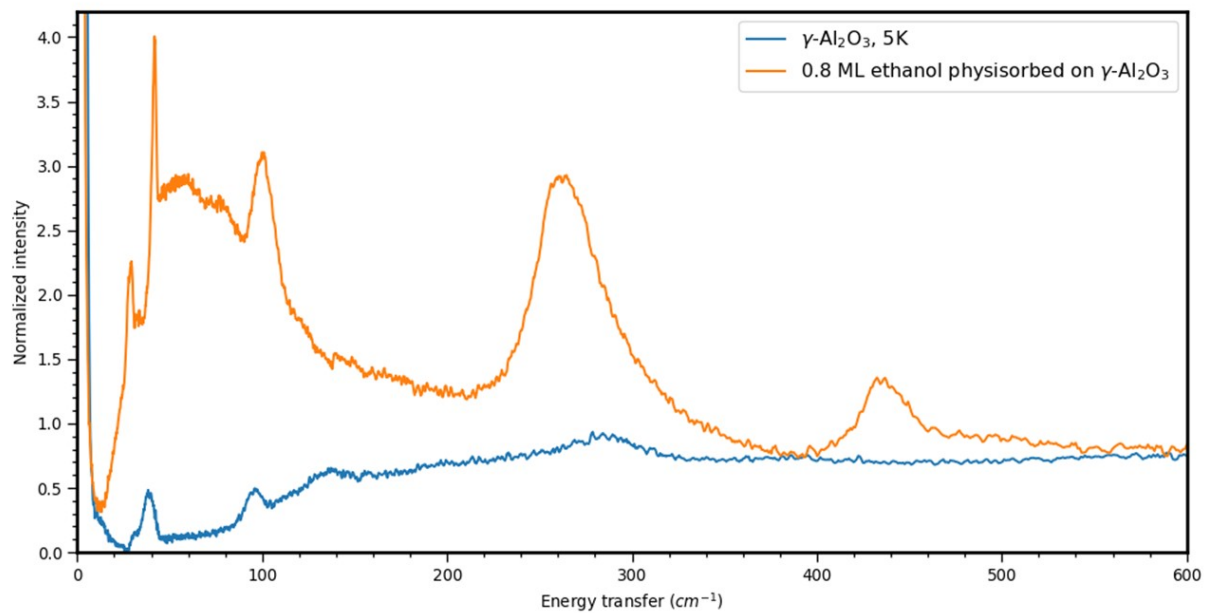

**Figure S11.** INS spectra of  $\gamma$ -alumina (blue) and 0.8 ML ethanol adsorbed on  $\gamma$ -alumina (orange) at 5 K in the low energy transfer regime ( $< 600 \text{ cm}^{-1}$ )
